# Supplementary material
Source: Springer Nature journal article supplement (https://www.springermedizin.de/resource/supplementary/12916_2012_550_MOESM2_ESM.pdf/9598138)

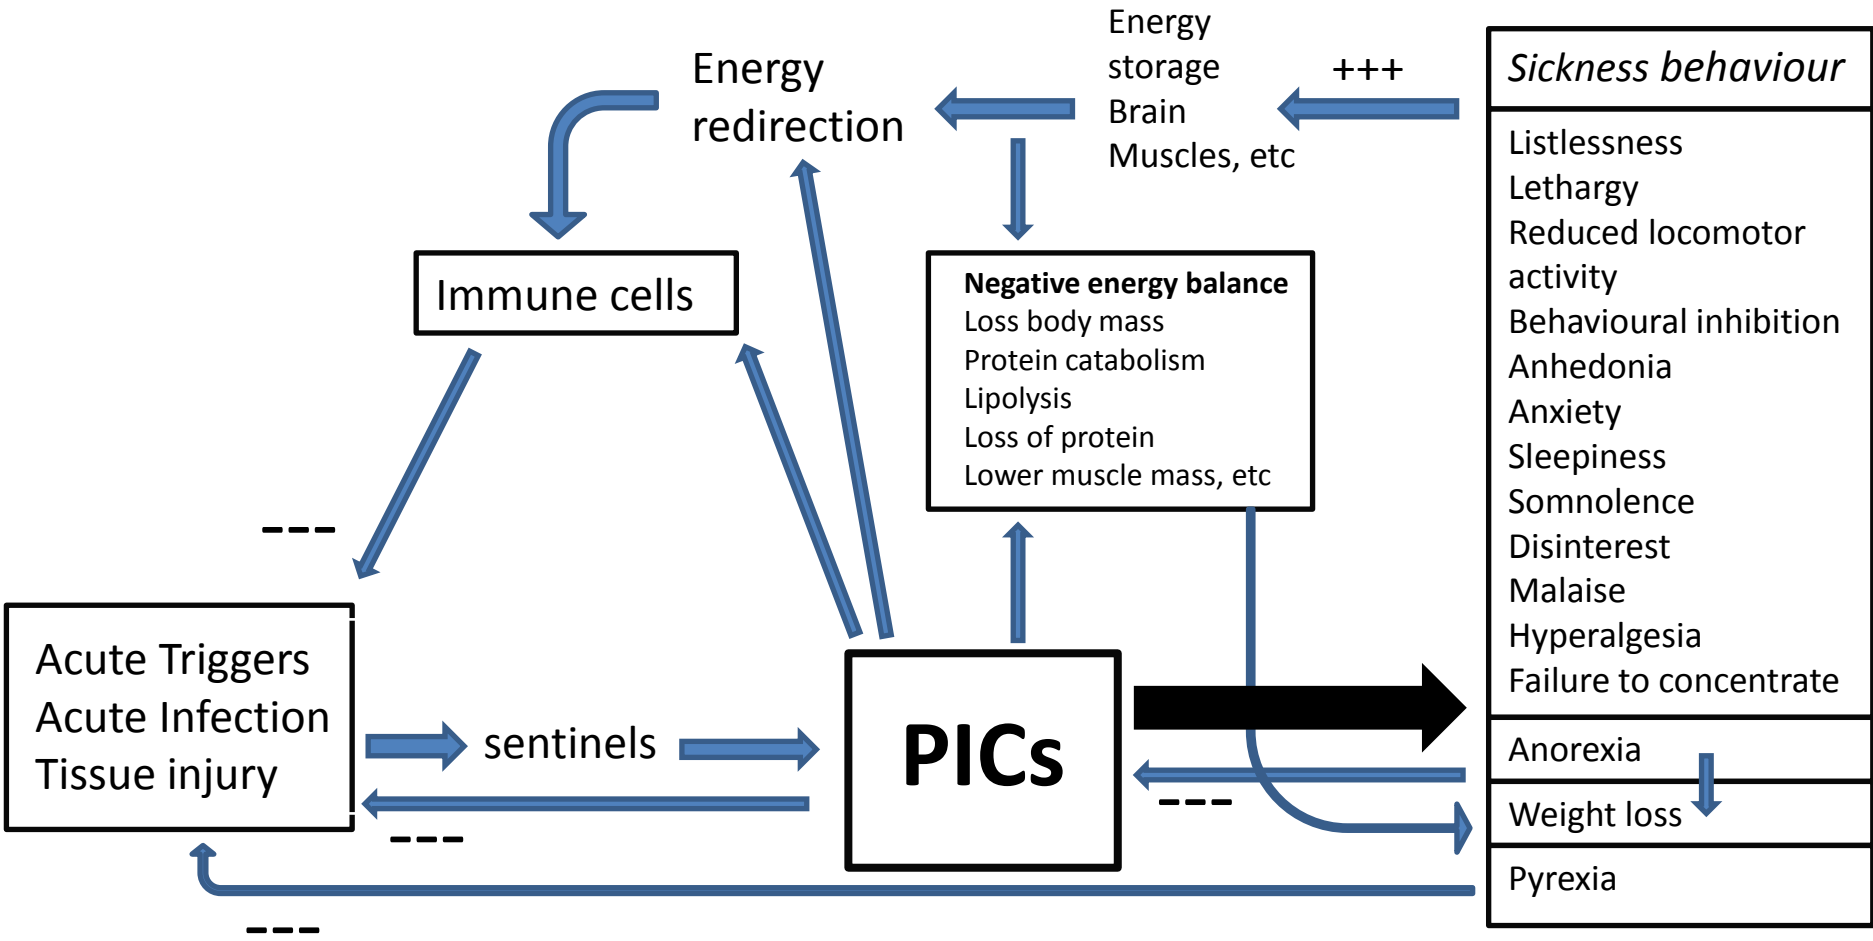

Supplement: MOESM2 [file 9598138]
